# Supplementary material for: Paracetamol, ibuprofen and dexamethasone for pain treatment after total hip arthroplasty: protocol for the randomised, placebo-controlled, parallel 4-group, blinded, multicentre RECIPE trial
Source: HighWire-hosted journal article supplement (doi:10.1136/bmjopen-2021-058965), 2022-09-01
Supplement: bmjopen-2021-058965supp001_data_supplement.pdf [file bmjopen-2021-058965supp001_data_supplement.pdf]

## Appendix 2. Definition of populations and violations

**Modified intention-to-treat population:** All randomised participants who have undergone the planned total hip arthroplasty surgery

**Per protocol population:** All randomised participants who have undergone planned total hip arthroplasty surgery except participants having one or more protocol violations as defined below.

### Major protocol violations

- Participants that did not receive the first combination of paracetamol and/or ibuprofen AND dexamethasone/placebo
- Participants withdrawing from the trial, allowing the use of registered data
- Patients undergoing surgery (besides the THA) OR a procedure in the intervention period that requires anaesthesia or sedation and/or analgesia
